# Supplementary material for: Polygenic cis-regulatory adaptation in the evolution of yeast pathogenicity
Source: HighWire-hosted journal article supplement (doi:10.1101/gr.134080.111), 2012-05-29
Supplement: Copy_of_supp_table_1.xlsx [file Copy_of_supp_table_1.xlsx]

## Sheet: sheet1
No.	Strain Name	Genotype	Parent	Reference	Comments
1	S1002	MATa/MATα gal2/gal2 lys2/lys2	S25	Ref. 35	S288c background
2	SHS001	ecm25∆::hphMX4/ECM25	S1002	This study
3	SHS002	ecm25∆::hphMX4/ECM25	S1002	This study
4	SHS003	ecm25∆::hphMX4/ECM25	S1002	This study
5	SHS004	sla1∆::hphMX4/SLA1	S1002	This study
6	SHS005	sla2∆::hphMX4/SLA2	S1002	This study
7	SHS006	sla2∆::hphMX4/SLA2	S1002	This study
8	SHS007	sla2∆::hphMX4/SLA2	S1002	This study
9	SHS008	lsb3∆::hphMX4/LSB3	S1002	This study
10	SHS009	lsb3∆::hphMX4/LSB3	S1002	This study
11	SHS010	lsb3∆::hphMX4/LSB3	S1002	This study
12	SHS011	bsp1∆::hphMX4/BSP1	S1002	This study
13	SHS012	bsp1∆::hphMX4/BSP1	S1002	This study
14	SHS013	bsp1∆::hphMX4/BSP1	S1002	This study
15	SHS014	syp1∆::hphMX4/SYP1	S1002	This study
16	SHS015	rad51∆::hphMX4/RAD51	S1002	This study
17	SHS016	rad51∆::hphMX4/RAD51	S1002	This study
18	SHS017	rad51∆::hphMX4/RAD51	S1002	This study
19	SHS018	inp52∆::hphMX4/INP52	S1002	This study
20	SHS019	inp52∆::hphMX4/INP52	S1002	This study
21	SHS020	inp52∆::hphMX4/INP52	S1002	This study
22	SHS021	las17∆::hphMX4/LAS17	S1002	This study
23	SHS022	las17∆::hphMX4/LAS17	S1002	This study
24	SHS023	las17∆::hphMX4/LAS17	S1002	This study
25	SHS029	vrp1∆::hphMX4/VRP1	S1002	This study
26	SHS031	end3∆::hphMX4/END3	S1002	This study
27	SHS032	end3∆::hphMX4/END3	S1002	This study
28	SHS033	end3∆::hphMX4/END3	S1002	This study
29	SHS034	vrp1∆::hphMX4/VRP1	S1002	This study
30	SHS035	syp1∆::hphMX4/SYP1	S1002	This study
31	SHS036	syp1∆::hphMX4/SYP1	S1002	This study
32	SHS037	vrp1∆::hphMX4/VRP1	S1002	This study
33	SHS038	bzz1∆::hphMX4/BZZ1	S1002	This study
34	SHS039	bzz1∆::hphMX4/BZZ1	S1002	This study
35	SHS040	bzz1∆::hphMX4/BZZ1	S1002	This study
36	SHS041	sla1∆::hphMX4/SLA1	S1002	This study
37	SHS042	sla1∆::hphMX4/SLA1	S1002	This study
38	SHS177	bzz1∆::natMX4	S1002	This study
39	SHS178	bzz1∆::natMX4	S1002	This study
40	SHS179	bzz1∆::natMX4	S1002	This study
41	SHS180	end3∆::natMX4	S1002	This study
42	SHS181	end3∆::natMX4	S1002	This study
43	SHS182	end3∆::natMX4	S1002	This study
44	XHS800	ecm25∆::hphMX4/ECM25-145	SHS001 x YJM385	This study
45	XHS801	ecm25∆::hphMX4/ECM25-145	SHS002 x YJM385	This study
46	XHS802	ecm25∆::hphMX4/ECM25-145	SHS003 x YJM385	This study
47	XHS803	ECM25-288/ecm25∆::natMX4	S1002 x YHS1020	This study
48	XHS804	ECM25-288/ecm25∆::natMX4	S1002 x YHS1002	This study
49	XHS805	ECM25-288/ecm25∆::natMX4	S1002 x YHS1003	This study
50	XHS806	BZZ1-288/bzz1∆::natMX4	S1002 x YHS1004	This study
51	XHS807	sla1∆::hphMX4/SLA1-145	SHS004 x YJM385	This study
52	XHS808	SLA1-288/sla1::natMX4	S1002 x YHS1005	This study
53	XHS809	SLA1-288/sla1::natMX4	S1002 x YHS1006	This study
54	XHS810	SLA1-288/sla1::natMX4	S1002 x YHS1007	This study
55	XHS811	sla2∆::hphMX4/SLA2-145	SHS005 x YJM385	This study
56	XHS812	sla2∆::hphMX4/SLA2-145	SHS006 x YJM385	This study
57	XHS813	sla2∆::hphMX4/SLA2-145	SHS007 x YJM385	This study
58	XHS814	lsb3∆::hphMX4/LSB3-145	SHS008 x YJM385	This study
59	XHS815	lsb3∆::hphMX4/LSB3-145	SHS009 x YJM385	This study
60	XHS816	lsb3∆::hphMX4/LSB3-145	SHS010 x YJM385	This study
61	XHS817	bsp1∆::hphMX4/BSP1-145	SHS011 x YJM385	This study
62	XHS818	bsp1∆::hphMX4/BSP1-145	SHS012 x YJM385	This study
63	XHS819	bsp1∆::hphMX4/BSP1-145	SHS013 x YJM385	This study
64	XHS820	BSP1-288/bsp1∆::natMX4	S1002 x YHS1008	This study
65	XHS821	BSP1-288/bsp1∆::natMX4	S1002 x YHS1009	This study
66	XHS822	BSP1-288/bsp1∆::natMX4	S1002 x YHS1010	This study
67	XHS823	syp1∆::hphMX4/SYP1-145	SHS014 x YJM385	This study
68	XHS824	rad51∆::hphMX4/RAD51-145	SHS015 x YJM385	This study
69	XHS825	rad51∆::hphMX4/RAD51-145	SHS016 x YJM385	This study
70	XHS826	rad51∆::hphMX4/RAD51-145	SHS017 x YJM395	This study
71	XHS827	RAD51-288/rad51::natMX4	S1002 x YHS1011	This study
72	XHS828	RAD51-288/rad51::natMX4	S1002 x YHS1012	This study
73	XHS829	RAD51-288/rad51::natMX4	S1002 x YHS1013	This study
74	XHS830	inp52∆::hphMX4/INP52-145	SHS018 x YJM385	This study
75	XHS831	inp52∆::hphMX4/INP52-146	SHS019 x YJM385	This study
76	XHS832	inp52∆::hphMX4/INP52-147	SHS020 x YJM385	This study
77	XHS833	INP52-288/inp52∆::natMX4	S1002 x YHS1014	This study
78	XHS834	las17∆::hphMX4/LAS17-145	SHS021 x YJM385	This study
79	XHS835	las17∆::hphMX4/LAS17-145	SHS022 x YJM385	This study
80	XHS836	las17∆::hphMX4/LAS17-145	SHS023 x YJM385	This study
81	XHS837	LAS17-288/las17::natMX4	S1002 x YHS1015	This study
82	XHS838	LAS17-288/las17::natMX4	S1002 x YHS1016	This study
83	XHS841	BZZ1-288/bzz1∆::natMX4	S1002 x YHS1020	This study
84	XHS842	SYP1-288/syp1::natMX4	S1002 x YHS1022	This study
85	XHS843	LAS17-288/las17::natMX4	S1002 x YHS1023	This study
86	XHS844	vrp1∆::hphMX4/VRP1-145	SHS029 x YJM385	This study
87	XHS845	end3∆::hphMX4/END3-145	SHS031 x YJM385	This study
88	XHS846	end3∆::hphMX4/END3-145	SHS032 x YJM385	This study
89	XHS847	end3∆::hphMX4/END3-145	SHS033 x YJM385	This study
90	XHS848	vrp1∆::hphMX4/VRP1-145	SHS034 x YJM385	This study
91	XHS849	syp1∆::hphMX4/SYP1-145	SHS035 x YJM385	This study
92	XHS850	syp1∆::hphMX4/SYP1-145	SHS036 x YJM385	This study
93	XHS855	vrp1∆::hphMX4/VRP1-145	SHS037 x YJM385	This study
94	XHS856	bzz1∆::hphMX4/BZZ1-145	SHS038 x YJM385	This study
95	XHS857	bzz1∆::hphMX4/BZZ1-145	SHS039 x YJM385	This study
96	XHS858	bzz1∆::hphMX4/BZZ1-145	SHS040 x YJM385	This study
97	XHS859	sla1∆::hphMX4/SLA1-145	SHS041 x YJM385	This study
98	XHS860	sla1∆::hphMX4/SLA1-145	SHS042 x YJM385	This study
99	XHS861	SYP1-288/syp1::natMX4	S1002 x YHS1024	This study
100	XHS862	INP52-288/inp52∆::natMX4	S1002 x YHS1025	This study
101	XHS863	VRP1-288/vrp1::natMX4	S1002 x YHS1026	This study
102	XHS864	END3-288/end3::natMX4	S1002 x YHS1027	This study
103	XHS865	END3-288/end3::natMX4	S1002 x YHS1028	This study
104	XHS869	LSB3-288/lsb3::natMX4	S1002 x YHS1029	This study
105	XHS870	LSB3-288/lsb3::natMX4	S1002 x YHS1030	This study
106	XHS871	SLA2-288/sla2::kanMX4	S1002 x YJM1031	This study
107	XHS902	bzz1∆::natMX4/BZZ1	SHS179 x YJM385	This study
108	XHS903	bzz1∆::natMX4/BZZ1	SHS178 x YJM385	This study
109	XHS904	bzz1∆::natMX4/BZZ1	SHS177 x YJM385	This study
110	XHS905	end3∆::natMX4/END3	SHS180 x YJM385	This study
111	XHS906	end3∆::natMX4/END3	SHS181 x YJM385	This study
112	XHS907	end3∆::natMX4/END3	SHS182 x YJM385	This study
113	XHS908	BZZ1/bzz1∆::hphMX4	S1002 x YHS1053	This study
114	XHS909	END3/end3∆::hphMX4	S1002 x YHS1054	This study
115	XHS910	END3/end3∆::hphMX4	S1002 x YHS1055	This study
116	YHS1002	ecm25∆::natMX4/ECM25	YJM385	This study
117	YHS1003	ecm25∆::natMX4/ECM25	YJM385	This study
118	YHS1004	bzz1∆::natMX4/BZZ1	YJM385	This study
119	YHS1005	sla1∆::natMX4/SLA1	YJM385	This study
120	YHS1006	sla1∆::natMX4/SLA1	YJM385	This study
121	YHS1007	sla1∆::natMX4/SLA1	YJM385	This study
122	YHS1008	bsp1∆::natMX4/BSP1	YJM385	This study
123	YHS1009	bsp1∆::natMX4/BSP1	YJM385	This study
124	YHS1010	bsp1∆::natMX4/BSP1	YJM385	This study
125	YHS1011	rad51∆::natMX4/RAD51	YJM385	This study
126	YHS1012	rad51∆::natMX4/RAD51	YJM385	This study
127	YHS1013	rad51∆::natMX4/RAD51	YJM385	This study
128	YHS1014	inp52∆::natMX4/INP52	YJM385	This study
129	YHS1015	las17∆::natMX4/LAS17	YJM385	This study
130	YHS1016	las17∆::natMX4/LAS17	YJM385	This study
131	YHS1020	bzz1∆::natMX4/BZZ1	YJM385	This study
132	YHS1020	ecm25∆::natMX4/ECM25	YJM385	This study
133	YHS1022	syp1∆::natMX4/SYP1	YJM385	This study
134	YHS1023	las17∆::natMX4/LAS17	YJM385	This study
135	YHS1024	syp1∆::natMX4/SYP1	YJM385	This study
136	YHS1025	inp52∆::natMX4/INP52	YJM385	This study
137	YHS1026	vrp1∆::natMX4/vrp1	YJM385	This study
138	YHS1027	end3∆::natMX4/END3	YJM385	This study
139	YHS1028	end3∆::natMX4/END3	YJM385	This study
140	YHS1029	lsb3∆::natMX4/LSB3	YJM385	This study
141	YHS1030	lsb3∆::natMX4/LSB3	YJM385	This study
142	YHS1031	sla2∆::kanMX4/SLA2	YJM385	This study
143	YHS1053	bzz1∆::hphMX4	YJM385	This study
144	YHS1054	end3∆::hphMX4	YJM385	This study
145	YHS1055	end3∆::hphMX4	YJM385	This study
146	YJM385	HO/HO MATa/MATα lys5/lys5	YJM145	Ref. 35
